# Supplementary material for: Basic Substances, a Sustainable Tool to Complement and Eventually Replace Synthetic Pesticides in the Management of Pre and Postharvest Diseases: Reviewed Instructions for Users
Source: MDPI journal article supplement (doi:10.3390/molecules27113484), 2022-05-28
Supplement: s1 [file s1]

# Supplementary materials

**Table S1.** Total time of basic substance application process within admissibility to Implementing Regulation publication in months.

| Deposit year | Approval year | Basic substances                               | Number of months: deposit → approval |
|--------------|---------------|------------------------------------------------|--------------------------------------|
| 2011         | 2014          | <i>Equisetum arvense</i> *                     | 22                                   |
| 2011         |               | Chitosan hydrochloride*                        | 22                                   |
| 2013         |               | Sucrose (saccharose)*                          | 9                                    |
| 2014         | 2015          | <i>Arctium lappa</i> **                        | 16                                   |
| 2013         |               | <i>Artemisia absinthium</i> **                 | 19                                   |
| 2013         |               | <i>Artemisia vulgaris</i> **                   | 23                                   |
| 2012         |               | Calcium hydroxide*                             | 26                                   |
| 2014         |               | Fructose*                                      | 15                                   |
| 2013         |               | Lecithins*                                     | 16                                   |
| 2013         |               | <i>Rheum off.</i> root extract**               | 17                                   |
| 2013         |               | <i>Salix</i> spp. cortex*                      | 20                                   |
| 2014         |               | Sodium hydrogen carbonate*                     | 13                                   |
| 2013         |               | <i>Tanacetum vulgare</i> **                    | 19                                   |
| 2013         |               | Vinegar*                                       | 20                                   |
| 2014         | 2016          | Diammonium phosphate*                          | 12                                   |
| 2015         |               | Sunflower oil*                                 | 13                                   |
| 2015         |               | Whey/Lactoserum*                               | 10                                   |
| 2015         | 2017          | <i>Achillea millefolium</i> **                 | 19                                   |
| 2016         |               | Beer*                                          | 11                                   |
| 2015         |               | Clayed charcoal*                               | 14                                   |
| 2015         |               | Hydrogen peroxide*                             | 11                                   |
| 2016         |               | Mustard seed powder*                           | 16                                   |
| 2015         |               | <i>Origanum vulgare</i> HE**                   | 14                                   |
| 2015         |               | Paprika extract E160c**                        | 21                                   |
| 2015         |               | Potassium sorbate**                            | 8                                    |
| 2015         |               | <i>Satureja montana</i> HE**                   | 14                                   |
| 2016         |               | Sodium chloride*                               | 13                                   |
| 2015         |               | <i>Urtica</i> spp.*                            | 15                                   |
| 2015         | 2018          | Landes pine tar**                              | 17                                   |
| 2016         |               | Onion oil*                                     | 17                                   |
| 2012         |               | Talc E553b*                                    | 70                                   |
| 2017         | 2020          | Cow milk*                                      | 30                                   |
| 2017         |               | Grape ( <i>Vitis vinifera</i> ) cane tannins** | 29                                   |
| 2018         |               | L-cysteine*                                    | 22                                   |
| 2016         |               | Propolis**                                     | 21                                   |
| 2015         |               | <i>Saponaria</i> off roots**                   | 37                                   |
| 2019         | 2021          | <i>Allium cepa</i> bulb extract*               | 19                                   |
| 2015         |               | Comfrey steeping**                             | 26                                   |
| 2019         |               | Dimethyl sulfide*                              | 15                                   |
| 2018         |               | Oleoresin capsicum**                           | 17                                   |
| 2018         |               | Willow stem and bark extract**                 | -                                    |
| 2018         | 2022          | Chitosan*                                      | 27                                   |

\* Approved Basic substances; \*\* Refused basic substances

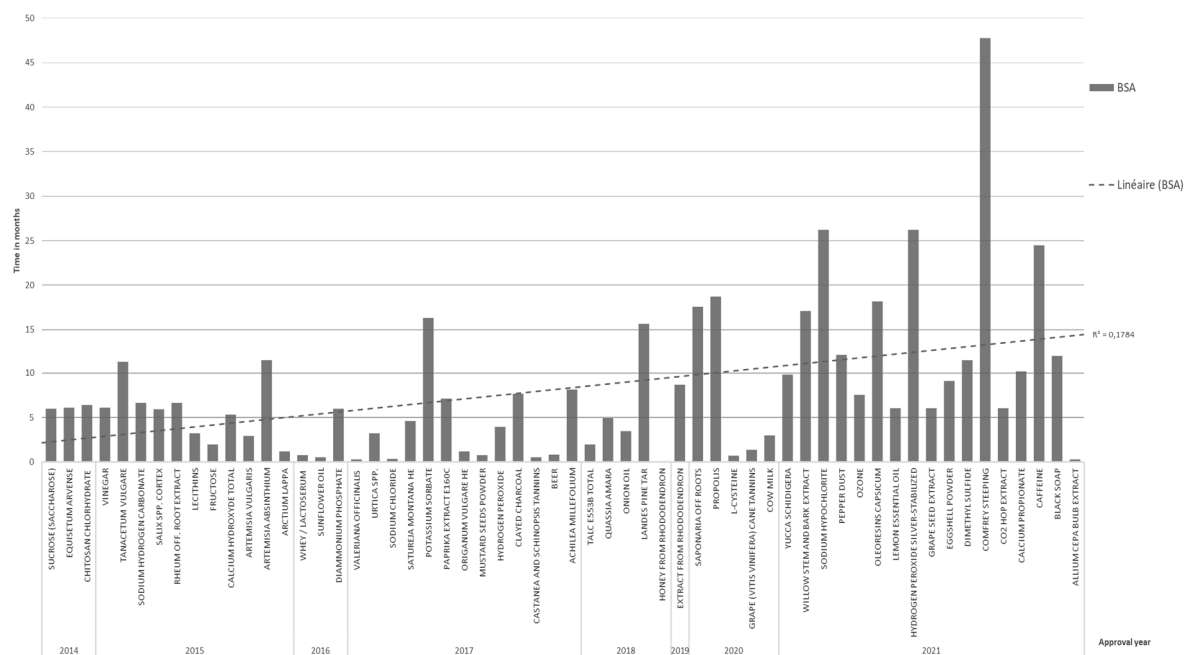

**Figure S1.** Time needed for Basic Substance Application admissibility evaluation over time (bars) and tendency line (dotted line).
